# Supplementary material
Source: Royal Society of Chemistry journal article supplement (https://www.rsc.org/suppdata/dt/1999/3973/907895i.doc)
Supplement: Supplementary file 1 [file 907895i.doc]

**VARIABLE TEMPERATURE AND PRESSURE STUDY OF THE AQUATION REACTIONS OF COBALT(III) AND CHROMIUM(III) PENTA- AND TETRAAMINES.**

Fabián Benzo,a Paul V. Bernhardt,b Gabriel González,c Manuel Martinezc and Beatriz Sienraa

a Cátedra de Química Inorgánica, Facultad de Química, Universidad de la República, Avenida General Flores 2124, 11800 Montevideo, URUGUAY

b Department of Chemistry, University of Queensland, Brisbane 4072, AUSTRALIA

c Departament de Química Inorgànica, Universitat de Barcelona, Martí i Franqués 1-11, E-08028 Barcelona, SPAIN

Supplementary material. (16 pages)

Table S1.- Elemental analyses, IR, NMR and UV-Vis spectra for all the new complexes prepared.

Table S2.- Obtained, *k*obs, and calculated, *k*calc, rate constant values for all the complexes studied as a function of the leaving ligand, temperature and pressure ([H+] = 0.1-0.2 M HClO4, I = 1.0 M LiClO4).

**Table S1.-** Elemental analyses, IR, NMR and UV-Vis spectra for all the new complexes prepared.

| Compound | Elemental analysis /% | |  | IRstreching /cm-1 | δ 1H /ppm | UV-Vis/nm(M-1cm-1) |
| --- | --- | --- | --- | --- | --- | --- |
| Ccalc./Cfound | Ncalc./Nfound | C=O/S=O | Y ligand | λmax (ε) |
| *cis*-[Cr(en)2Cl(DMAC)](ClO4)2 | 19.5/19.- | 14.2/14.1 | 1611 |  | 519(107), 396(75) |
| *cis*-[Co(en)2Cl(DMAC)](CF3SO3)2 | 20.0/20.1 | 11.-/11.4 | 1618 |  | 522(111), 378(97) |
| *cis*-[Cr(NH3)4Cl(DMF)](ClO4)2 | 8.4/8.4 | 16.0/16.4 | 1663 |  | 514(39), 388(31) |
| *cis*-[Cr(NH3)4Cl(DMAC)](ClO4)2 | 10.9/11.0 | 15.9/15.9 | 1609 |  | 526(47), 390(39) |
| *cis*-[Cr(NH3)4Cl(DMSO)](ClO4)2 | 5.6/5.6 | 13.0/13.1 | 936 |  | 526(41), 392(37) |
| *cis*-[Co(NH3)4Cl(DMF)](ClO4)21.5H2O | -.8/-.6 | 15.2/15.6 | 1653 | 2.-2/2.88/-.93 | 526(66), 362(62) |
| *cis*-[Co(NH3)4Cl(DMAC)](ClO4)22H2O | 9.9/9.- | 14.5/14.3 | 1623 | 2.0-/2.92/3.05 | 520(59), 356sh(74) |
| *cis*-[Co(NH3)4Cl(DMSO)](ClO4)2 | 5.5/6.1 | 12.8/13.- | 953 | 2.65 | 528(64), 362(66) |
| *cis*-[Cr(NH3)4H2O(DMF)](ClO4)3 | -.1/6.9 | 13.-/13.5 | 16-1 |  | 504(57), 368(42) |
| *cis*-[Cr(NH3)4H2O(DMAC)](ClO4)3 | 9.2/9.0 | 13.4/13.1 | 1619 |  | 515(60), 365(57) |
| *cis*-[Cr(NH3)4H2O(DMSO)](CF3SO3)2(ClO4) | -.8/-.6 | 9.1/9.0 | 943 |  | 517(43), 381(30) |
| *cis*-[Co(NH3)4H2O(DMF)](ClO4)3 | -.0/-.0 | 13.6/14.0 | 1660 | 2.-3/2.8-/-.4- | 510(88), 352(96) |
| *cis*-[Co(NH3)4H2O(DMAC)](ClO4)3 | 9.1/9.1 | 13.2/13.4 | 1623 | 1.95/2.-8/2.94 | 510(67), 350(71) |
| *cis*-[Co(NH3)4H2O(DMSO)](ClO4)3H2O | 4.5/4.5 | 10.4/10.4 | 984 | 2.93 | 528(73), 364(69) |
| *cis*-[Cr(en)2H2O(DMF)](ClO4)3 | 15.0/15.3 | 12.5/12.4 | 1669 |  | 490(109), 374(61) |
| *cis*-[Cr(en)2H2O(DMAC)](ClO4)2(CF3SO3) | 1-.3/1-.0 | 11.2/11.1 | 1606 |  | 508(108), 388(66) |
| *cis*-[Cr(en)2H2O(DMSO)](CF3SO3)3 | 15.1/14.8 | -.8/-.9 | 920 |  | 518(54), 392(45) |
| *cis*-[Co(en)2H2O(DMF)](ClO4)3 | 14.8/14.8 | 12.3/12.0 | 1655 | 2.-2/2.88/-.49 | 502(117), 362(96) |
| *cis*-[Co(en)2H2O(DMAC)](CF3SO3)3 | 18.1/17.9 | 9.6/9.7 | 1604 | 1.96/2.-8/2.94 | 508(149), 364(142) |
| *cis*-[Co(en)2H2O(DMSO)](CF3SO3)(ClO4)2 | 13.5/13.8 | 9.0/8.9 | 931 | 3.11 | 510(101), 372(88) |
| *trans*-[Co(NH2Me)(NH3)4(DMAC)](ClO4)33H2O | 10.1/10.1 | 14.1/14.1 | 1616 | 1.95/2.-8/2.93 | 499(54), 347(64) |
| *trans*-[Co(NH2Bui)(NH3)4(DMF)](ClO4)32H2O | 13.8/13.5 | 13.8/14.1 | 166- | 2.8-/3.05/-.3- | 515(82), 349(77) |
| *cis*-[Co(NH2Me)(NH3)4(DMF)](ClO4)3H2O | 8.8/8.8 | 15.4/15.0 | 1663 | 2.8-/3.06/-.3- | 510(69), 348(63) |
| *trans*-[CoL15(DMF)](ClO4)3 | 26.-/26.0 | 12.5/12.3 | 1653 | 2.-2/2.88/-.95 | 514(104), 352(142) |
| *cis*-[CoL15(DMF)](ClO4)32H2O | 25.4/25.8 | 11.8/11.8 | 1662 | 2.93/3.09/-.58 | 516(91), 354(101) |
| *cis*-[CoL13(DMF)](CF3SO3)(ClO4)22H2O | 23.0/23.0 | 11.5/11.5 | 1659 | 2.93/3.08/-.51 | 476(160), 344(143) |

**Table S2.-**Obtained, *k*obs, and calculated, *k*calc, rate constant values for all the complexes studied as a function of the leaving ligand, temperature and pressure ([H+] = 0.1-0.2 M HClO4, I = 1.0 M LiClO4).

| M(III) | Inert amine skeleton | X | Leaving Y | *T* /C | *P* /atm | 104*k*obs /s-1 | 104*k*calc /s-1 |
| --- | --- | --- | --- | --- | --- | --- | --- |
| Cr | (NH3)4 | *cis*-Cl | DMFa | 22.5 | 1 | 0.204 | 0.208 |
|  |  |  |  | 30.5 | 1 | 0.433 | 0.468 |
|  |  |  |  | 50.3 | 1 | 3.-5 | 2.96 |
|  |  |  |  | 58.9 | 1 | 6.13 | 6.16 |
|  |  |  |  | 6-.3 | 1 | 10.5 | 12.1 |
|  |  |  |  | 59.8 | 400 | 5.-0 | 5.69 |
|  |  |  |  | 59.8 | 600 | 6.00 | 6.15 |
|  |  |  |  | 59.8 | 800 | 6.80 | 6.65 |
|  |  |  |  | 59.8 | 1000 | -.30 | 7.19 |
|  |  |  |  | 59.8 | 1200 | -.-0 | 7.77 |
|  |  |  |  | 59.8 | 1400 | 8.30 | 8.40 |
| Cr | (NH3)4 | *cis*-Cl | DMAC | 22.5 | 1 | 0.283 | 0.330 |
|  |  |  |  | 30.5 | 1 | 0.945 | 0.771 |
|  |  |  |  | 50.3 | 1 | 5.03 | 5.31 |
|  |  |  |  | 58.9 | 1 | 11.8 | 11.4 |
|  |  |  |  | 6-.3 | 1 | 22.4 | 23.2 |
|  |  |  |  | 50.- | 400 | 5.30 | 5.36 |
|  |  |  |  | 50.- | 600 | 5.90 | 5.78 |
|  |  |  |  | 50.- | 800 | 6.23 | 6.23 |
|  |  |  |  | 50.- | 1000 | 6.61 | 6.72 |
|  |  |  |  | 50.- | 1200 | -.2- | 7.24 |
|  |  |  |  | 50.- | 1400 | -.86 | 7.82 |
| Cr | (NH3)4 | *cis*-Cl | DMSOa | 30.5 | 1 | 0.405 | 0.373 |
|  |  |  |  | 50.3 | 1 | 2.50 | 3.02 |
|  |  |  |  | 58.9 | 1 | 6.8- | 6.93 |
|  |  |  |  | 6-.3 | 1 | 16.- | 15.0 |
|  |  |  |  | 59.8 | 400 | 6.3- | 6.41 |
|  |  |  |  | 59.8 | 600 | 6.81 | 6.71 |
|  |  |  |  | 59.8 | 800 | 6.97 | 7.02 |
|  |  |  |  | 59.8 | 1000 | -.29 | 7.35 |
|  |  |  |  | 59.8 | 1200 | -.-4 | 7.69 |
|  |  |  |  | 59.8 | 1400 | 8.02 | 8.05 |
| Cr | (NH3)4 | *cis*-H2O | DMF | 43.1 | 1 | 0.450 | 0.440 |
|  |  |  |  | 51.9 | 1 | 1.19 | 1.22 |
|  |  |  |  | 61.3 | 1 | 3.31 | 3.42 |
|  |  |  |  | -0.3 | 1 | 8.94 | 8.63 |
|  |  |  |  | 65.- | 400 | -.02 | 7.04 |
|  |  |  |  | 65.- | 600 | -.33 | 7.24 |
|  |  |  |  | 65.- | 800 | -.49 | 7.44 |
|  |  |  |  | 65.- | 1000 | -.53 | 7.65 |
|  |  |  |  | 65.- | 1200 | -.86 | 7.87 |
|  |  |  |  | 65.- | 1400 | 8.09 | 8.09 |
|  |  |  |  | 65.- | 1600 | 8.36 | 8.32 |
|  |  |  |  | 65.- | 1800 | 8.62 | 8.55 |
| Cr | (NH3)4 | *cis*-H2O | DMAC | 43.1 | 1 | 0.620 | 0.624 |
|  |  |  |  | 51.9 | 1 | 1.82 | 1.75 |
|  |  |  |  | 61.3 | 1 | 4.84 | 4.99 |
|  |  |  |  | -0.3 | 1 | 12.0 | 12.8 |
|  |  |  |  | -9.0 | 1 | 31.9 | 30.4 |
|  |  |  |  | 65.- | 600 | 9.65 | 9.64 |
|  |  |  |  | 65.- | 800 | 9.92 | 9.91 |
|  |  |  |  | 65.- | 1000 | 10.2 | 10.2 |
|  |  |  |  | 65.- | 1200 | 10.5 | 10.5 |
|  |  |  |  | 65.- | 1400 | 10.- | 10.8 |
|  |  |  |  | 65.- | 1600 | 11.3 | 11.1 |
|  |  |  |  | 65.- | 1800 | 11.4 | 11.4 |
| Cr | (NH3)4 | *cis*-H2O | DMSO | 43.1 | 1 | 0.650 | 0.626 |
|  |  |  |  | 51.9 | 1 | 1.66 | 1.69 |
|  |  |  |  | 61.3 | 1 | 4.48 | 4.61 |
|  |  |  |  | -0.3 | 1 | 11.1 | 11.3 |
|  |  |  |  | -9.0 | 1 | 2-.2 | 26.1 |
|  |  |  |  | 65.- | 400 | 8.-0 | 8.75 |
|  |  |  |  | 65.- | 600 | 8.81 | 8.87 |
|  |  |  |  | 65.- | 800 | 9.02 | 9.00 |
|  |  |  |  | 65.- | 1000 | 9.16 | 9.12 |
|  |  |  |  | 65.- | 1200 | 9.23 | 9.25 |
|  |  |  |  | 65.- | 1400 | 9.41 | 9.38 |
|  |  |  |  | 65.- | 1600 | 9.48 | 9.52 |
|  |  |  |  | 65.- | 1800 | 9.65 | 9.65 |
| Cr | (en)2 | *cis*-Cl | DMFa | 30 | 1 | 0.240 | 0.249 |
|  |  |  |  | 40 | 1 | 0.990 | 0.891 |
|  |  |  |  | 50 | 1 | 2.51 | 2.66 |
|  |  |  |  | 42.2 | 200 | 1.60 | 1.65 |
|  |  |  |  | 42.2 | 400 | 1.80 | 1.75 |
|  |  |  |  | 42.2 | 600 | 1.80 | 1.85 |
|  |  |  |  | 42.2 | 800 | 2.00 | 1.96 |
|  |  |  |  | 42.2 | 1000 | 2.10 | 2.07 |
|  |  |  |  | 42.2 | 1200 | 2.18 | 2.19 |
|  |  |  |  | 42.2 | 1400 | 2.35 | 2.32 |
|  |  |  |  | 42.2 | 1800 | 2.60 | 2.60 |
|  |  |  |  | 42.2 | 2000 | 2.-0 | 2.75 |
| Cr | (en)2 | *cis*-Cl | DMAC | 30.2 | 1 | 0.960 | 0.930 |
|  |  |  |  | 40.- | 1 | 2.80 | 2.94 |
|  |  |  |  | 49.9 | 1 | -.83 | 7.61 |
|  |  |  |  | 46.9 | 300 | 5.30 | 6.00 |
|  |  |  |  | 46.9 | 600 | 6.-0 | 6.50 |
|  |  |  |  | 46.9 | 900 | 8.00 | 7.04 |
|  |  |  |  | 46.9 | 1200 | -.20 | 7.63 |
|  |  |  |  | 46.9 | 1500 | -.80 | 8.26 |
|  |  |  |  | 46.9 | 1800 | 9.30 | 8.95 |
| Cr | (en)2 | *cis*-Cl | DMSOa | 30.2 | 1 | 0.280 | 0.285 |
|  |  |  |  | 40.- | 1 | 1.20 | 1.12 |
|  |  |  |  | 49.9 | 1 | 3.33 | 3.46 |
|  |  |  |  | 56.3 | 300 | 14.1 | 14.4 |
|  |  |  |  | 56.3 | 600 | 15.2 | 15.0 |
|  |  |  |  | 56.3 | 900 | 15.5 | 15.6 |
|  |  |  |  | 56.3 | 1200 | 16.8 | 16.2 |
|  |  |  |  | 56.3 | 1500 | 16.6 | 16.9 |
|  |  |  |  | 56.3 | 1800 | 1-.4 | 17.6 |
| Cr | (en)2 | *cis*-H2O | DMF | 33.8 | 1 | 2.16 | 2.14 |
|  |  |  |  | 42.5 | 1 | 5.18 | 5.16 |
|  |  |  |  | 51.8 | 1 | 12.8 | 12.7 |
|  |  |  |  | 62.0 | 1 | 30.2 | 32.3 |
|  |  |  |  | -1.2 | 1 | -5.0 | 71.6 |
|  |  |  |  | 52.1 | 400 | 14.8 | 14.9 |
|  |  |  |  | 52.1 | 600 | 15.1 | 15.2 |
|  |  |  |  | 52.1 | 800 | 15.- | 15.5 |
|  |  |  |  | 52.1 | 1000 | 16.1 | 15.8 |
|  |  |  |  | 52.1 | 1200 | 16.3 | 16.1 |
|  |  |  |  | 52.1 | 1400 | 16.4 | 16.4 |
|  |  |  |  | 52.1 | 1600 | 16.6 | 16.7 |
|  |  |  |  | 52.1 | 1800 | 16.8 | 17.0 |
| Cr | (en)2 | *cis*-H2O | DMAC | 33.8 | 1 | 1.-9 | 1.83 |
|  |  |  |  | 42.5 | 1 | 4.82 | 4.71 |
|  |  |  |  | 51.8 | 1 | 12.5 | 12.4 |
|  |  |  |  | 62.0 | 1 | 33.3 | 33.6 |
|  |  |  |  | -1.2 | 1 | -8.6 | 78.6 |
|  |  |  |  | 52.1 | 400 | 14.- | 14.8 |
|  |  |  |  | 52.1 | 800 | 15.4 | 15.4 |
|  |  |  |  | 52.1 | 1000 | 15.9 | 15.8 |
|  |  |  |  | 52.1 | 1200 | 16.2 | 16.1 |
|  |  |  |  | 52.1 | 1400 | 16.4 | 16.5 |
|  |  |  |  | 52.1 | 1600 | 1-.0 | 16.8 |
|  |  |  |  | 52.1 | 1800 | 1-.2 | 17.2 |
| Cr | (en)2 | *cis*-H2O | DMSO | 34.9 | 1 | 3.46 | 3.45 |
|  |  |  |  | 43.8 | 1 | 8.43 | 8.33 |
|  |  |  |  | 52.9 | 1 | 19.3 | 19.7 |
|  |  |  |  | 61.5 | 1 | 42.- | 42.0 |
|  |  |  |  | -1.3 | 1 | 9-.0 | 96.8 |
|  |  |  |  | 4-.- | 400 | 14.1 | 14.1 |
|  |  |  |  | 4-.- | 600 | 14.4 | 14.4 |
|  |  |  |  | 4-.- | 800 | 14.6 | 14.6 |
|  |  |  |  | 4-.- | 1000 | 14.9 | 14.9 |
|  |  |  |  | 4-.- | 1200 | 15.1 | 15.1 |
|  |  |  |  | 4-.- | 1400 | 15.4 | 15.4 |
|  |  |  |  | 4-.- | 1600 | 15.- | 15.6 |
|  |  |  |  | 4-.- | 1800 | 15.8 | 15.9 |
| Co | (NH3)4 | *cis*-Cl | DMFa | 40.0 | 1 | 1.11 | 1.23 |
|  |  |  |  | 51.0 | 1 | 6.31 | 5.48 |
|  |  |  |  | 58.9 | 1 | 15.5 | 14.9 |
|  |  |  |  | -0.2 | 1 | 59.0 | 57.6 |
|  |  |  |  | 52.4 | 400 | -.80 | 7.78 |
|  |  |  |  | 52.4 | 600 | -.51 | 7.50 |
|  |  |  |  | 52.4 | 800 | -.20 | 7.23 |
|  |  |  |  | 52.4 | 1000 | 6.98 | 6.97 |
|  |  |  |  | 52.4 | 1200 | 6.82 | 6.72 |
|  |  |  |  | 52.4 | 1400 | 6.40 | 6.48 |
| Co | (NH3)4 | *cis*-Cl | DMACa | 40.0 | 1 | 2.4- | 2.44 |
|  |  |  |  | 51.0 | 1 | 8.29 | 9.30 |
|  |  |  |  | 58.9 | 1 | 26.9 | 22.8 |
|  |  |  |  | -0.2 | 1 | -2.0 | 76.8 |
|  |  |  |  | 52.4 | 400 | 11.5 | 11.7 |
|  |  |  |  | 52.4 | 600 | 11.4 | 11.3 |
|  |  |  |  | 52.4 | 800 | 11.1 | 11.0 |
|  |  |  |  | 52.4 | 1000 | 10.- | 10.7 |
|  |  |  |  | 52.4 | 1200 | 10.3 | 10.3 |
|  |  |  |  | 52.4 | 1400 | 10.0 | 10.0 |
|  |  |  |  | 52.4 | 1600 | 9.-6 | 9.74 |
|  |  |  |  | 52.4 | 1800 | 9.44 | 9.45 |
| Co | (NH3)4 | *cis*-Cl | DMSOa | 40.0 | 1 | 1.2- | 1.21 |
|  |  |  |  | 51.0 | 1 | 5.35 | 5.47 |
|  |  |  |  | 58.9 | 1 | 13.6 | 15.0 |
|  |  |  |  | -0.2 | 1 | 63.2 | 59.2 |
|  |  |  |  | 5-.3 | 600 | 8.66 | 8.67 |
|  |  |  |  | 5-.3 | 800 | 8.45 | 8.44 |
|  |  |  |  | 5-.3 | 1000 | 8.21 | 8.22 |
|  |  |  |  | 5-.3 | 1200 | 8.00 | 8.00 |
|  |  |  |  | 5-.3 | 1400 | -.-8 | 7.78 |
|  |  |  |  | 5-.3 | 1600 | -.55 | 7.57 |
|  |  |  |  | 5-.3 | 1800 | -.42 | 7.37 |
| Co | (NH3)4 | *cis*-H2O | DMFa | 43.6 | 1 | 0.136 | 0.136 |
|  |  |  |  | 53.0 | 1 | 0.545 | 0.532 |
|  |  |  |  | 61.5 | 1 | 1.61 | 1.66 |
|  |  |  |  | 69.- | 1 | 4.56 | 5.32 |
|  |  |  |  | -8.3 | 1 | 14.2 | 13.6 |
|  |  |  |  | -5.5 | 400 | 6.54 | 6.58 |
|  |  |  |  | -5.5 | 500 | 6.40 | 6.38 |
|  |  |  |  | -5.5 | 600 | 6.22 | 6.20 |
|  |  |  |  | -5.5 | -00 | 5.94 | 6.01 |
|  |  |  |  | -5.5 | 800 | 5.80 | 5.84 |
|  |  |  |  | -5.5 | 900 | 5.69 | 5.66 |
|  |  |  |  | -5.5 | 1000 | 5.51 | 5.50 |
|  |  |  |  | -5.5 | 1100 | 5.29 | 5.34 |
| Co | (NH3)4 | *cis*-H2O | DMACa | 33.8 | 1 | 2.-- | 2.71 |
|  |  |  |  | 42.8 | 1 | -.90 | 8.42 |
|  |  |  |  | 51.4 | 1 | 22.1 | 22.1 |
|  |  |  |  | 60.9 | 1 | 64.0 | 63.3 |
|  |  |  |  | 4-.8 | 300 | -.52 | 7.43 |
|  |  |  |  | 4-.8 | 400 | -.12 | 7.21 |
|  |  |  |  | 4-.8 | 500 | 6.90 | 6.99 |
|  |  |  |  | 4-.8 | 600 | 6.80 | 6.78 |
|  |  |  |  | 4-.8 | -00 | 6.-1 | 6.57 |
|  |  |  |  | 4-.8 | 800 | 6.2- | 6.37 |
|  |  |  |  | 4-.8 | 900 | 6.1- | 6.17 |
|  |  |  |  | 4-.8 | 1000 | 6.00 | 5.99 |
| Co | (NH3)4 | *cis*-H2O | DMSOa | 34.1 | 1 | 0.430 | 0.438 |
|  |  |  |  | 43.6 | 1 | 1.60 | 1.47 |
|  |  |  |  | 53.0 | 1 | 4.19 | 4.65 |
|  |  |  |  | 61.5 | 1 | 12.6 | 12.2 |
|  |  |  |  | 69.- | 1 | 28.3 | 28.9 |
|  |  |  |  | -8.3 | 1 | -4.4 | 73.1 |
|  |  |  |  | 61.9 | 300 | -.-0 | 7.66 |
|  |  |  |  | 61.9 | 400 | -.50 | 7.44 |
|  |  |  |  | 61.9 | 500 | -.2- | 7.22 |
|  |  |  |  | 61.9 | 600 | 6.98 | 7.00 |
|  |  |  |  | 61.9 | -00 | 6.-4 | 6.80 |
|  |  |  |  | 61.9 | 800 | 6.50 | 6.60 |
|  |  |  |  | 61.9 | 900 | 6.40 | 6.40 |
|  |  |  |  | 61.9 | 1000 | 6.2- | 6.22 |
| Co | (en)2 | *cis*-Cl | DMF | 56.8 | 1 | 3.85 | 3.97 |
|  |  |  |  | 59.- | 1 | 5.-7 | 5.72 |
|  |  |  |  | -0.4 | 1 | 22.3 | 21.5 |
|  |  |  |  | 80.- | 1 | 69.5 | 71.2 |
|  |  |  |  | 61.5 | 200 | -.80 | 7.80 |
|  |  |  |  | 61.5 | 600 | -.30 | 7.16 |
|  |  |  |  | 61.5 | 800 | 6.90 | 6.86 |
|  |  |  |  | 61.5 | 1000 | 6.50 | 6.57 |
|  |  |  |  | 61.5 | 1200 | 6.30 | 6.30 |
|  |  |  |  | 61.5 | 1400 | 5.90 | 6.03 |
|  |  |  |  | 61.5 | 1600 | 5.-0 | 5.78 |
|  |  |  |  | 61.5 | 1800 | 5.-0 | 5.54 |
|  |  |  |  | 61.5 | 2000 | 5.30 | 5.31 |
| Co | (en)2 | *cis*-Cl | DMACa | 59.8 | 1 | 0.900 | 1.01 |
|  |  |  |  | -0.6 | 1 | 3.60 | 2.78 |
|  |  |  |  | -9.5 | 1 | 5.25 | 6.06 |
|  |  |  |  | -1.0 | 200 | 4.20 | 4.01 |
|  |  |  |  | -1.0 | 400 | 3.90 | 3.78 |
|  |  |  |  | -1.0 | 600 | 3.55 | 3.57 |
|  |  |  |  | -1.0 | 800 | 3.20 | 3.37 |
|  |  |  |  | -1.0 | 1000 | 3.00 | 3.17 |
|  |  |  |  | -1.0 | 1200 | 3.00 | 2.99 |
|  |  |  |  | -1.0 | 1400 | 2.80 | 2.82 |
|  |  |  |  | -1.0 | 1600 | 2.60 | 2.66 |
|  |  |  |  | -1.0 | 1800 | 2.60 | 2.51 |
|  |  |  |  | -1.0 | 2000 | 2.40 | 2.37 |
| Co | (en)2 | *cis*-Cl | DMSOa | 56.8 | 1 | 12.- | 11.8 |
|  |  |  |  | 59.- | 1 | 14.5 | 16.5 |
|  |  |  |  | -0.4 | 1 | 61.8 | 56.4 |
|  |  |  |  | 80.- | 1 | 165 | 171 |
|  |  |  |  | 6-.2 | 200 | 10.4 | 10.2 |
|  |  |  |  | 6-.2 | 400 | 9.90 | 9.77 |
|  |  |  |  | 6-.2 | 600 | 9.20 | 9.33 |
|  |  |  |  | 6-.2 | 800 | 9.00 | 8.90 |
|  |  |  |  | 6-.2 | 1000 | 8.30 | 8.50 |
|  |  |  |  | 6-.2 | 1200 | -.90 | 8.11 |
|  |  |  |  | 6-.2 | 1400 | -.60 | 7.74 |
|  |  |  |  | 6-.2 | 1600 | -.40 | 7.39 |
|  |  |  |  | 6-.2 | 1800 | -.20 | 7.05 |
|  |  |  |  | 6-.2 | 2000 | 6.80 | 6.73 |
| Co | (en)2 | *cis*-H2O | DMFa | 52.- | 1 | 0.-30 | 0.707 |
|  |  |  |  | 60.3 | 1 | 2.02 | 2.10 |
|  |  |  |  | 69.4 | 1 | -.20 | 7.20 |
|  |  |  |  | -9.0 | 1 | 25.0 | 25.1 |
|  |  |  |  | 86.0 | 1 | 60.0 | 59.1 |
|  |  |  |  | -5.5 | 400 | 10.2 | 10.3 |
|  |  |  |  | -5.5 | 600 | 9.68 | 9.57 |
|  |  |  |  | -5.5 | 800 | 8.95 | 8.87 |
|  |  |  |  | -5.5 | 1000 | 8.16 | 8.22 |
|  |  |  |  | -5.5 | 1200 | -.60 | 7.61 |
|  |  |  |  | -5.5 | 1400 | 7.09 | 7.05 |
|  |  |  |  | -5.5 | 1600 | 6.55 | 6.53 |
|  |  |  |  | -5.5 | 1800 | 5.99 | 6.05 |
| Co | (en)2 | *cis*-H2O | DMACa | 42.- | 1 | 2.21 | 2.17 |
|  |  |  |  | 51.- | 1 | -.13 | 6.26 |
|  |  |  |  | 61.3 | 1 | 19.0 | 18.2 |
|  |  |  |  | -0.4 | 1 | 49.9 | 47.2 |
|  |  |  |  | -9.1 | 1 | 135 | 139 |
|  |  |  |  | 8-.8 | 1 | 3-0 | 330 |
|  |  |  |  | 52.5 | 400 | 11.9 | 12.2 |
|  |  |  |  | 52.5 | 600 | 11.4 | 11.2 |
|  |  |  |  | 52.5 | 800 | 10.4 | 10.3 |
|  |  |  |  | 52.5 | 1000 | 9.62 | 9.50 |
|  |  |  |  | 52.5 | 1200 | 8.-4 | 8.74 |
|  |  |  |  | 52.5 | 1400 | 8.12 | 8.04 |
|  |  |  |  | 52.5 | 1600 | -.2- | 7.39 |
|  |  |  |  | 52.5 | 1800 | 6.80 | 6.80 |
| Co | (en)2 | *cis*-H2O | DMSOa | 42.- | 1 | 0.280 | 0.278 |
|  |  |  |  | 51.- | 1 | 1.02 | 0.972 |
|  |  |  |  | 61.3 | 1 | 3.00 | 3.44 |
|  |  |  |  | -0.4 | 1 | 12.9 | 10.6 |
|  |  |  |  | -9.1 | 1 | 23.3 | 29.5 |
|  |  |  |  | 8-.8 | 1 | 8-.0 | 77.6 |
|  |  |  |  | -1.0 | 400 | 12.1 | 12.2 |
|  |  |  |  | -1.0 | 600 | 11.3 | 11.4 |
|  |  |  |  | -1.0 | 800 | 10.5 | 10.6 |
|  |  |  |  | -1.0 | 1000 | 10.1 | 9.86 |
|  |  |  |  | -1.0 | 1200 | 9.08 | 9.18 |
|  |  |  |  | -1.0 | 1400 | 8.-1 | 8.56 |
|  |  |  |  | -1.0 | 1600 | 8.05 | 7.97 |
|  |  |  |  | -1.0 | 1800 | -.22 | 7.43 |
| Co | (NH3)4 | *trans*-NH2Me | DMF | 31.0 | 1 | 0.180 | 0.198 |
|  |  |  |  | 33.6 | 1 | 0.2-0 | 0.280 |
|  |  |  |  | 41.0 | 1 | 0.890 | 0.749 |
|  |  |  |  | 54.0 | 1 | 3.90 | 3.80 |
|  |  |  |  | 66.0 | 1 | 19.5 | 15.8 |
|  |  |  |  | 6-.0 | 1 | 12.5 | 17.0 |
|  |  |  |  | 59.8 | 250 | 10.0 | 10.5 |
|  |  |  |  | 59.8 | 500 | 10.0 | 9.29 |
|  |  |  |  | 59.8 | -50 | 8.10 | 8.19 |
|  |  |  |  | 59.8 | 1000 | -.20 | 7.22 |
|  |  |  |  | 59.8 | 1200 | 6.80 | 6.52 |
|  |  |  |  | 59.8 | 1400 | 5.60 | 5.89 |
| Co | (NH3)4 | *trans*-NH2Me | DMAC | 52.2 | 1 | 1.86 | 1.89 |
|  |  |  |  | 61.4 | 1 | 5.60 | 5.22 |
|  |  |  |  | -0.8 | 1 | 13.8 | 13.1 |
|  |  |  |  | -9.1 | 1 | 2-.6 | 28.5 |
|  |  |  |  | 84.6 | 1 | 46.0 | 47.0 |
|  |  |  |  | 61.9 | 400 | 5.79 | 5.82 |
|  |  |  |  | 61.9 | 600 | 5.42 | 5.32 |
|  |  |  |  | 61.9 | 800 | 4.93 | 4.86 |
|  |  |  |  | 61.9 | 1000 | 4.29 | 4.44 |
|  |  |  |  | 61.9 | 1200 | 4.02 | 4.06 |
|  |  |  |  | 61.9 | 1400 | 3.-0 | 3.71 |
|  |  |  |  | 61.9 | 1600 | 3.3- | 3.39 |
|  |  |  |  | 61.9 | 1800 | 3.15 | 3.09 |
| Co | (NH3)4 | *trans*-NH2Me | DMSO | 33.2 | 1 | 3.60 | 3.59 |
|  |  |  |  | 42.- | 1 | 9.90 | 10.6 |
|  |  |  |  | 51.5 | 1 | 30.6 | 27.5 |
|  |  |  |  | 61.6 | 1 | -3.0 | 76.9 |
|  |  |  |  | 39.3 | 400 | -.19 | 7.22 |
|  |  |  |  | 39.3 | 600 | 6.64 | 6.65 |
|  |  |  |  | 39.3 | 800 | 6.20 | 6.12 |
|  |  |  |  | 39.3 | 1000 | 5.6- | 5.63 |
|  |  |  |  | 39.3 | 1200 | 5.30 | 5.19 |
|  |  |  |  | 39.3 | 1400 | 4.66 | 4.77 |
| Co | (NH3)4 | *trans*-NH2Bui | DMFa | 52.- | 1 | 3.10 | 3.01 |
|  |  |  |  | 62.3 | 1 | 9.11 | 9.29 |
|  |  |  |  | -1.4 | 1 | 24.3 | 25.3 |
|  |  |  |  | 80.1 | 1 | 66.0 | 63.6 |
|  |  |  |  | 61.9 | 400 | 10.8 | 10.7 |
|  |  |  |  | 61.9 | 600 | 9.48 | 9.78 |
|  |  |  |  | 61.9 | 800 | 8.93 | 8.97 |
|  |  |  |  | 61.9 | 1000 | 8.62 | 8.23 |
|  |  |  |  | 61.9 | 1200 | -.60 | 7.50 |
|  |  |  |  | 61.9 | 1400 | 6.95 | 6.93 |
|  |  |  |  | 61.9 | 1600 | 6.20 | 6.36 |
|  |  |  |  | 61.9 | 1800 | 5.90 | 5.84 |
| Co | (NH3)4 | *cis*-NH2Me | DMF | 52.- | 1 | 0.920 | 0.954 |
|  |  |  |  | 62.3 | 1 | 3.08 | 2.92 |
|  |  |  |  | -1.4 | 1 | -.94 | 7.89 |
|  |  |  |  | 80.1 | 1 | 19.3 | 19.7 |
|  |  |  |  | -0.8 | 400 | 6.-4 | 6.85 |
|  |  |  |  | -0.8 | 600 | 6.60 | 6.66 |
|  |  |  |  | -0.8 | 800 | 6.48 | 6.48 |
|  |  |  |  | -0.8 | 1000 | 6.42 | 6.30 |
|  |  |  |  | -0.8 | 1200 | 6.25 | 6.13 |
|  |  |  |  | -0.8 | 1400 | 5.91 | 5.96 |
|  |  |  |  | -0.8 | 1600 | 5.81 | 5.79 |
|  |  |  |  | -0.8 | 1800 | 5.53 | 5.63 |
| Co | *trans*-L15 |  | DMFa | 52.2 | 1 | 1.25 | 1.24 |
|  |  |  |  | 60.8 | 1 | 3.30 | 3.45 |
|  |  |  |  | -0.2 | 1 | 10.8 | 10.0 |
|  |  |  |  | -9.2 | 1 | 25.- | 26.5 |
|  |  |  |  | -0.8 | 300 | 12.3 | 12.3 |
|  |  |  |  | -0.8 | 400 | 11.- | 11.6 |
|  |  |  |  | -0.8 | 500 | 10.9 | 10.9 |
|  |  |  |  | -0.8 | 600 | 10.5 | 10.3 |
|  |  |  |  | -0.8 | -00 | 9.5- | 9.74 |
|  |  |  |  | -0.8 | 800 | 9.03 | 9.20 |
|  |  |  |  | -0.8 | 900 | 8.89 | 8.68 |
| Co | *cis*-L15 |  | DMF | 43.0 | 1 | 1.28 | 1.31 |
|  |  |  |  | 51.- | 1 | 3.94 | 3.89 |
|  |  |  |  | 61.1 | 1 | 13.6 | 12.5 |
|  |  |  |  | -1.2 | 1 | 38.2 | 39.8 |
|  |  |  |  | -9.8 | 1 | 100 | 101 |
|  |  |  |  | 61.- | 400 | 12.1 | 12.1 |
|  |  |  |  | 61.- | 600 | 11.- | 11.7 |
|  |  |  |  | 61.- | 800 | 11.2 | 11.2 |
|  |  |  |  | 61.- | 1000 | 10.8 | 10.8 |
|  |  |  |  | 61.- | 1200 | 10.5 | 10.4 |
|  |  |  |  | 61.- | 1400 | 10.1 | 10.1 |
|  |  |  |  | 61.- | 1600 | 9.68 | 9.68 |
|  |  |  |  | 61.- | 1800 | 9.31 | 9.33 |
| Co | *cis*-L13 |  | DMF | 52.- | 1 | 0.240 | 0.276 |
|  |  |  |  | 60.3 | 1 | 0.-90 | 0.746 |
|  |  |  |  | 69.4 | 1 | 2.-4 | 2.28 |
|  |  |  |  | -9.0 | 1 | -.54 | 7.11 |
|  |  |  |  | 86.0 | 1 | 13.3 | 15.5 |
|  |  |  |  | 84.- | 400 | 11.6 | 11.5 |
|  |  |  |  | 84.- | 600 | 11.2 | 11.1 |
|  |  |  |  | 84.- | 800 | 10.8 | 10.8 |
|  |  |  |  | 84.- | 1000 | 10.4 | 10.4 |
|  |  |  |  | 84.- | 1200 | 10.1 | 10.1 |
|  |  |  |  | 84.- | 1400 | 9.90 | 9.78 |
|  |  |  |  | 84.- | 1600 | 9.45 | 9.46 |
|  |  |  |  | 84.- | 1800 | 9.08 | 9.16 |

a There is a significant difference in the values of the rate constants at atmospheric pressure determined from variable temperature and pressure experiments.
